# Supplementary material for: Highly Flexible Poly(1,12-dodecylene 5,5′-isopropylidene-bis(ethyl 2-furoate)): A Promising Biobased Polyester Derived from a Renewable Cost-Effective Bisfuranic Precursor and a Long-Chain Aliphatic Spacer
Source: MDPI journal article supplement (doi:10.3390/molecules28104124), 2023-05-16
Supplement: s1 [file s1]

# Highly Flexible Poly(1,12-dodecylene 5,5'-Isopropylidene-bis(ethyl 2-furoate)): A Promising Biobased Polyester Derived from a Renewable Cost-Effective Bisfuranic Precursor and a Long-Chain Aliphatic Spacer

Sami Zaidi <sup>1,2</sup>, Abdelkader Bougarech <sup>2</sup>, Majdi Abid <sup>3</sup>, Souhir Abid <sup>2,3</sup>, Armando J. D. Silvestre <sup>1</sup> and Andreia F. Sousa <sup>1,4,\*</sup>

<sup>1</sup> CICECO–Aveiro Institute of Materials and Department of Chemistry, University of Aveiro, 3810-193 Aveiro, Portugal

<sup>2</sup> Faculty des Sciences, Laboratory de Chimie Appliquée HCGP, Université de Sfax, Sfax 3038, Tunisia

<sup>3</sup> Chemistry Department, College of Science and Arts in Al-Qurayyat, Jouf University, Al-Qurayyat P.O. Box 756, Al Jouf, Saudi Arabia

<sup>4</sup> CEMMPRE, Department of Chemical Engineering, University of Coimbra, 3030-790 Coimbra, Portugal

\* Correspondence: andreiafs@ua.pt

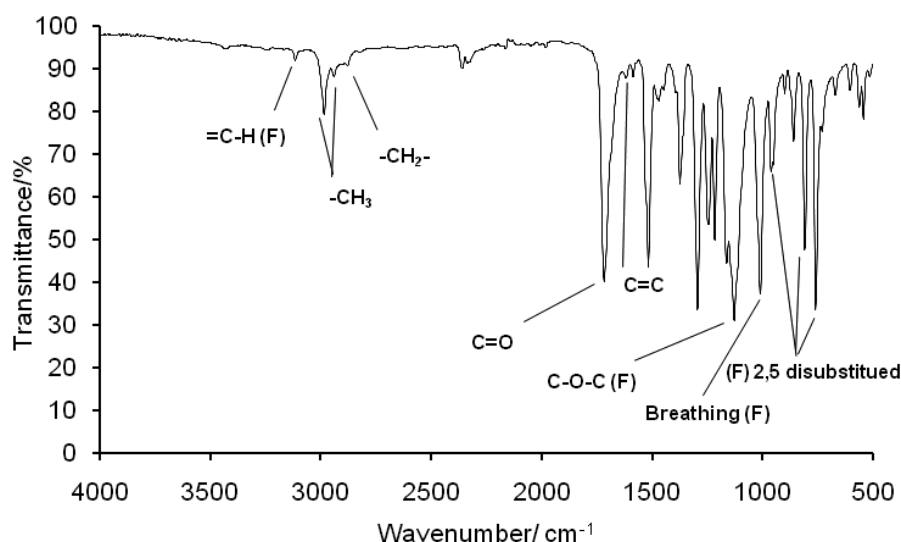

**Figure S1.** FTIR spectrum of DEbF.

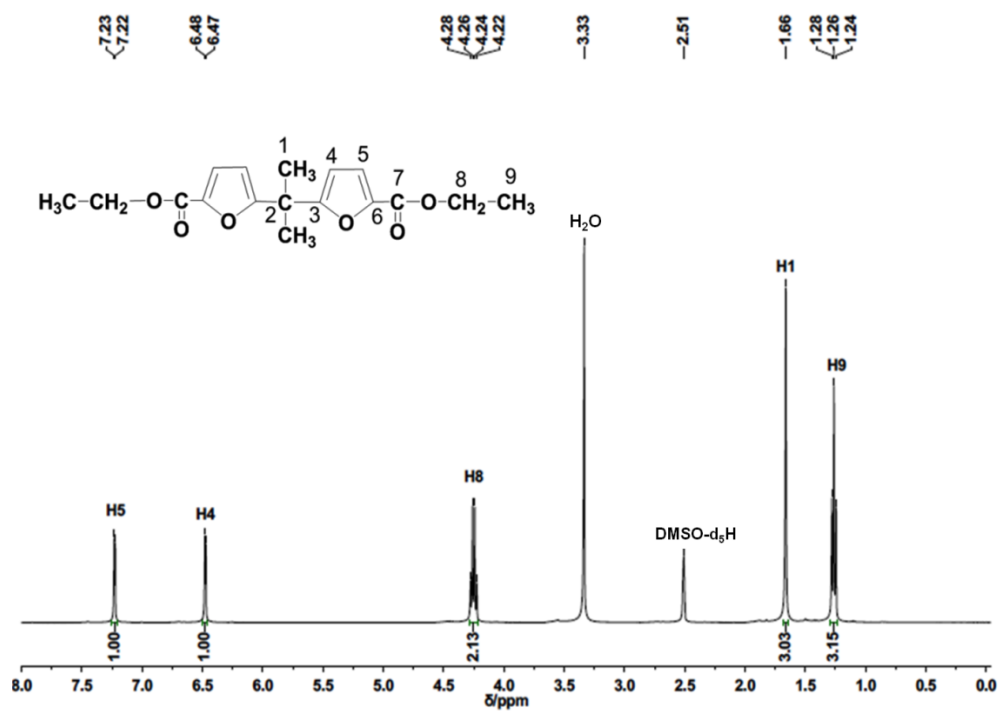

Figure S2. <sup>1</sup>H NMR spectrum of DEbF.

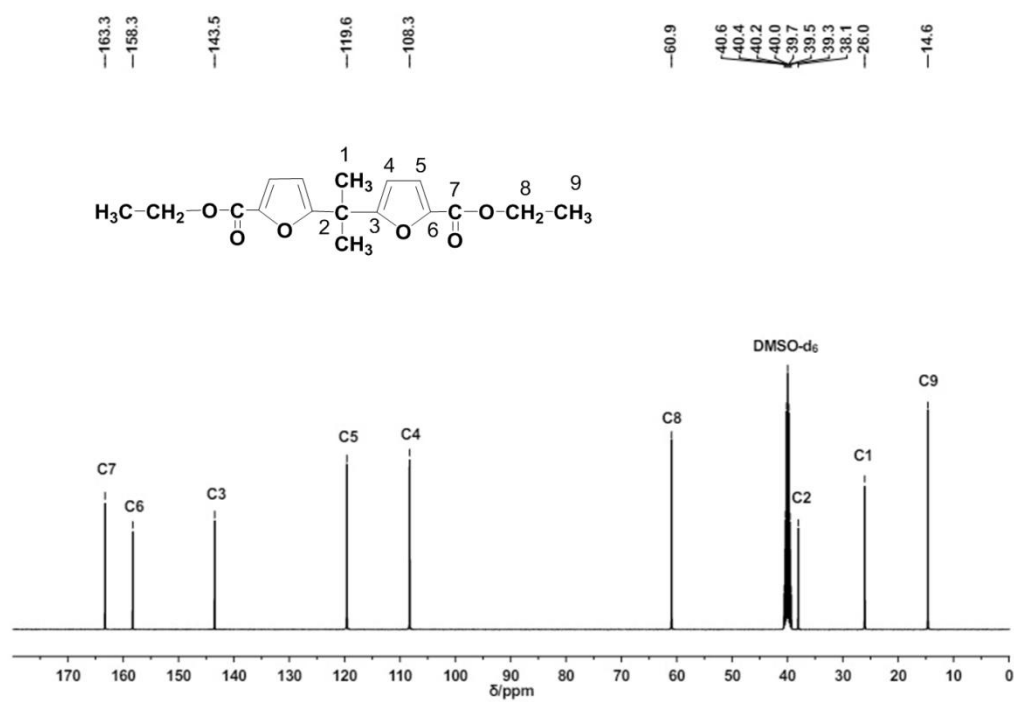

Figure S3. <sup>13</sup>C NMR spectrum of DEbF.

**Table S1.**  $^1\text{H}$  NMR resonances [300 MHz,  $\text{CDCl}_3\text{-d}$ ] of PDDbF.

| Assignments     | $\delta/\text{ppm}$ | multiplicity | Integration area |
|-----------------|---------------------|--------------|------------------|
| H5              | 6.97-6.98           | d            | 1.00             |
| H4              | 6.10-6.11           | d            | 1.00             |
| H8              | 4.15-4.20           | t            | 2.19             |
| H1,H9           | 1.59-1.66           | m            | 5.85             |
| H10,H11,H12,H13 | 1.20-1.30           | m            | 9.91             |

d: doublet; t: triplet; m: multiplet.

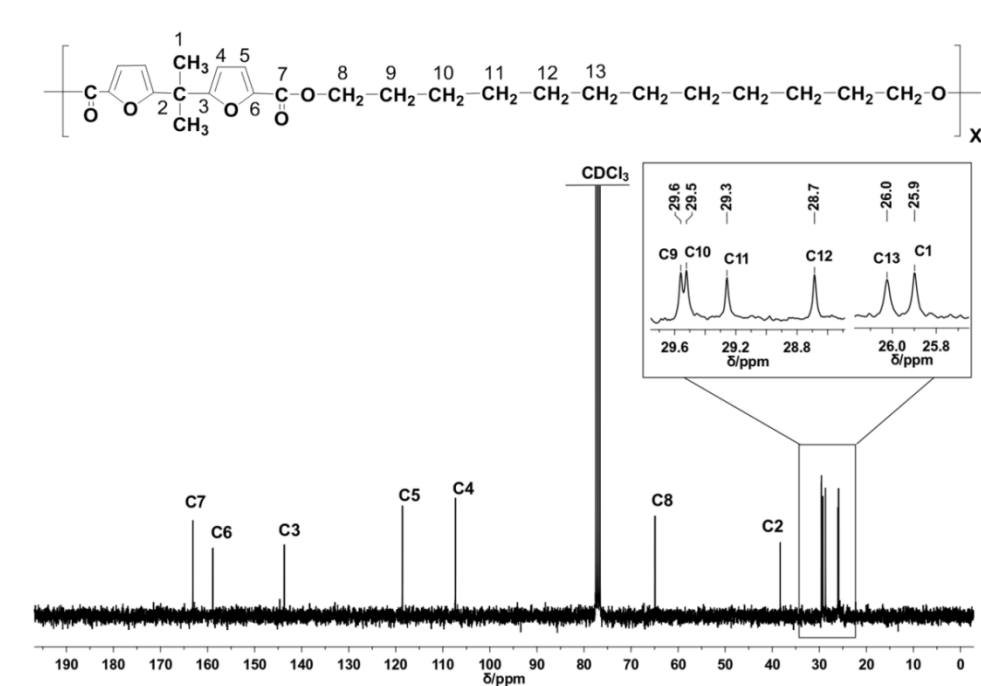

**Figure S4.**  $^{13}\text{C}$  NMR spectrum of PDDbF. The inset figure shows the different methylene and methyl proton resonances.

**Table S2.**  $^{13}\text{C}$  NMR chemical shifts assignments of PDDbF.

| Assignments | $\delta/\text{ppm}$ |
|-------------|---------------------|
| C7          | 163.1               |
| C6          | 158.9               |
| C3          | 143.7               |
| C5          | 118.6               |
| C4          | 107.3               |
| C8          | 64.9                |
| C2          | 38.3                |
| C9          | 29.6                |
| C10         | 29.5                |
| C11         | 29.3                |
| C12         | 28.7                |
| C13         | 26.0                |
| C1          | 25.9                |

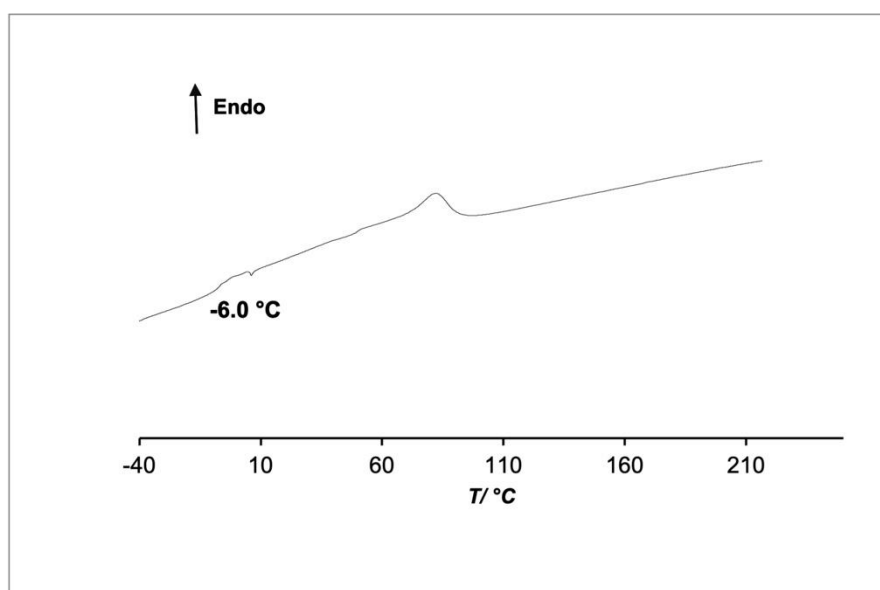

**Figure S5.** DSC thermogram for PDDbF.

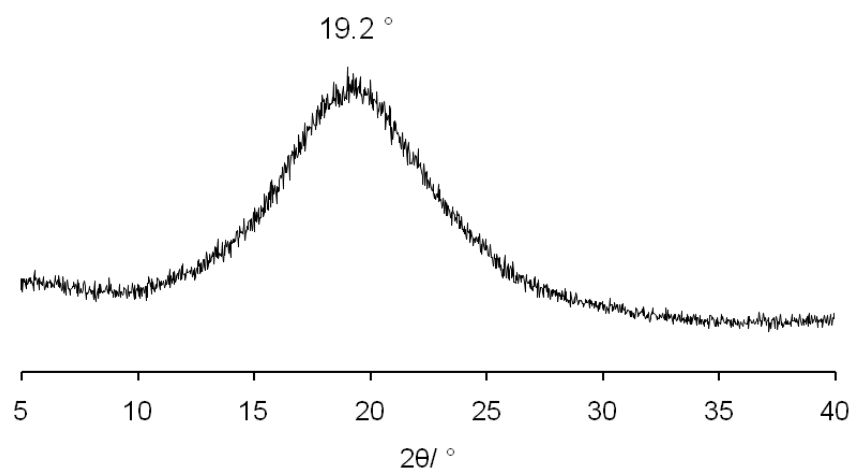

**Figure S6.** XRD pattern of PDDbF.

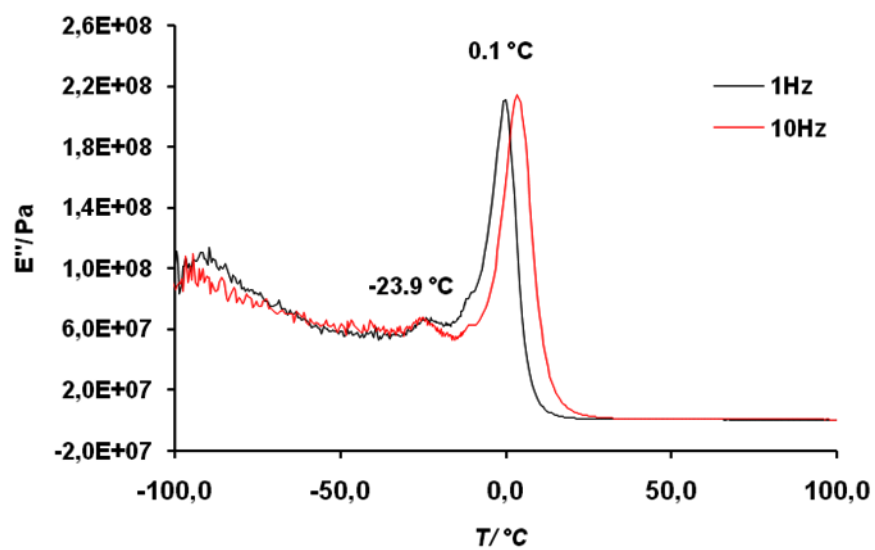

**Figure S7.** Loss modulus trace of PDDbF.
